# Supplementary material
Source: PubMed Central journal article supplement (PMC1995627)
Supplement: tjp0576-0215-fs1.pdf [file tjp0576-0215-fs1.pdf]

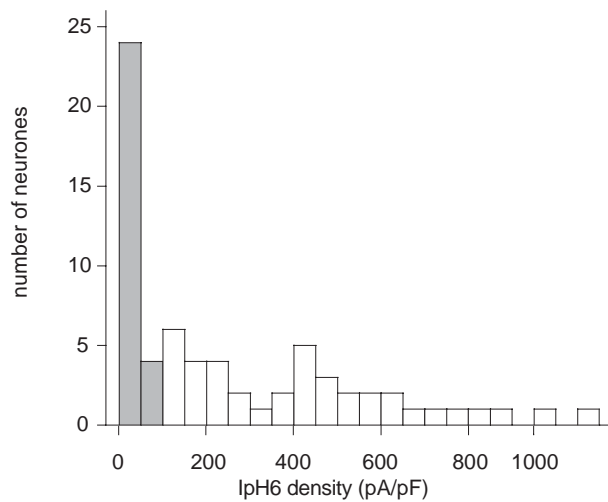

Figure 1: Histogram of type 1 IpH6 density distribution. The number of type 1-expressing neurones is represented as a function of IpH6 current density per range of 50 pA/pF. We observed a wide distribution of IpH6 density. However, approximately 50 % of type 1 expressing neurones present IpH6 currents < 100 pA/pF (gray bars), n = 68.
